# Supplementary material
Source: PubMed Central journal article supplement (PMC4517697)
Supplement: supp_kwv041_kwv041supp.pdf [file supp_kwv041_kwv041supp.pdf]

**Web Table 1. Odds ratios (ORs) and 95% confidence intervals (CIs) for leptin concentration and pancreatic cancer by sex, smoking status, and follow-up time in the Alpha-Tocopherol, Beta-Carotene, Cancer Prevention Study (1985-2009), Cancer Prevention Study II Nutrition Cohort (1998-2006), and Prostate, Lung, Colorectal, and Ovarian Cancer Screening Trial (1992-2010) Cohorts**

|                                      | Overall |          |                  | < 5 years |          |                         | 5 - <10 years |           |                         | ≥10 years |          |                         |
|--------------------------------------|---------|----------|------------------|-----------|----------|-------------------------|---------------|-----------|-------------------------|-----------|----------|-------------------------|
|                                      | Cases   | Controls | OR 95% CI        | Cases     | Controls | OR 95% CI               | Cases         | Controls  | OR 95% CI               | Cases     | Controls | OR 95% CI               |
| <b>By sex<sup>1</sup></b>            |         |          |                  |           |          |                         |               |           |                         |           |          |                         |
| <b>Female</b>                        |         |          |                  |           |          |                         |               |           |                         |           |          |                         |
| Q1 <sup>2</sup>                      | 29      | 43       | 1.00 (ref)       | 11        | 17       | 1.00 (ref)              | 18            | 26        | 1.00 (ref)              | -         | -        | -                       |
| Q2                                   | 28      | 43       | 1.15 (0.52-2.54) | 9         | 18       | 0.84 (0.21-3.37)        | 19            | 25        | 1.46 (0.53-4.05)        | -         | -        | -                       |
| Q3                                   | 33      | 44       | 1.35 (0.58-3.13) | 14        | 13       | 1.75 (0.37-8.21)        | 19            | 31        | 0.97 (0.32-2.90)        | -         | -        | -                       |
| Q4                                   | 30      | 43       | 1.09 (0.45-2.60) | 11        | 17       | 0.68 (0.15-3.05)        | 19            | 26        | 0.94 (0.29-3.03)        | -         | -        | -                       |
| Q5                                   | 35      | 44       | 1.20 (0.46-3.16) | 15        | 23       | 0.44 (0.08-2.59)        | 20            | 21        | 1.70 (0.47-6.19)        | -         | -        | -                       |
| <i>p-trend</i> <sup>3</sup>          | -       | -        | 0.78             | -         | -        | 0.10                    | -             | -         | 0.56                    | -         | -        | -                       |
| Per SD <sup>4</sup>                  | 155     | 217      | 0.96 (0.71-1.30) | 60        | 88       | 0.64 (0.35-1.15)        | 95            | 129       | 1.13 (0.75-1.71)        | -         | -        | -                       |
| <b>Male</b>                          |         |          |                  |           |          |                         |               |           |                         |           |          |                         |
| Q1 <sup>2</sup>                      | 120     | 138      | 1.00 (ref)       | 34        | 35       | 1.00 (ref)              | 32            | 32        | 1.00 (ref)              | 54        | 71       | 1.00 (ref)              |
| Q2                                   | 110     | 138      | 0.91 (0.63-1.33) | 28        | 40       | 0.82 (0.38-1.78)        | 28            | 32        | 0.83 (0.38-1.79)        | 54        | 66       | 1.17 (0.68-2.03)        |
| Q3                                   | 104     | 139      | 0.93 (0.62-1.39) | 31        | 39       | 0.96 (0.42-2.19)        | 30            | 44        | 0.67 (0.31-1.45)        | 43        | 56       | 1.11 (0.59-2.08)        |
| Q4                                   | 130     | 138      | 1.23 (0.82-1.86) | 36        | 38       | 1.34 (0.56-3.20)        | 33            | 59        | 0.62 (0.29-1.34)        | 61        | 41       | <b>2.43 (1.26-4.70)</b> |
| Q5                                   | 112     | 139      | 1.14 (0.72-1.80) | 31        | 58       | 0.70 (0.28-1.72)        | 31            | 45        | 0.86 (0.34-2.13)        | 50        | 36       | <b>2.94 (1.34-6.46)</b> |
| <i>p-trend</i> <sup>3</sup>          | -       | -        | 0.23             | -         | -        | 0.26                    | -             | -         | 0.63                    | -         | -        | <b>0.001</b>            |
| Per SD <sup>4</sup>                  | 576     | 692      | 1.10 (0.94-1.29) | 160       | 210      | 0.84 (0.61-1.15)        | 154           | 212       | 1.07 (0.80-1.44)        | 262       | 270      | <b>1.53 (1.15-2.04)</b> |
| <i>p-heterogeneity</i> <sup>5</sup>  | -       | -        | 0.73             | -         | -        | -                       | -             | -         | -                       | -         | -        | -                       |
| <b>By Smoking Status<sup>6</sup></b> |         |          |                  |           |          |                         |               |           |                         |           |          |                         |
| <b>Never</b>                         |         |          |                  |           |          |                         |               |           |                         |           |          |                         |
| Q1 <sup>2</sup>                      | 21      | 54       | 1.00 (ref)       | 8         | 22       | 1.00 (ref)              | 7             | 22        | 1.00 (ref)              | 6         | 10       | 1.00 (ref)              |
| Q2                                   | 28      | 47       | 1.51 (0.74-3.06) | 7         | 19       | 1.03 (0.29-3.61)        | 13            | 21        | 1.84 (0.59-5.73)        | 8         | 7        | 1.60 (0.36-7.13)        |
| Q3                                   | 36      | 50       | 1.80 (0.88-3.68) | 17        | 13       | <b>3.90 (1.11-13.7)</b> | 16            | 28        | 1.87 (0.61-5.76)        | 3         | 9        | 0.47 (0.08-2.92)        |
| Q4                                   | 29      | 48       | 1.58 (0.75-3.36) | 15        | 12       | <b>4.01 (1.07-15.1)</b> | 7             | 30        | 0.90 (0.25-3.17)        | 7         | 6        | 1.75 (0.30-10.2)        |
| Q5                                   | 43      | 65       | 1.65 (0.75-3.65) | 17        | 35       | 0.98 (0.24-4.00)        | <b>19</b>     | <b>22</b> | <b>4.00 (1.09-14.7)</b> | 7         | 8        | 1.23 (0.21-7.24)        |
| <i>p-trend</i> <sup>3</sup>          | -       | -        | 0.79             | -         | -        | 0.09                    | -             | -         | 0.14                    | -         | -        | 0.63                    |
| Per SD <sup>4</sup>                  | 157     | 264      | 0.97 (0.77-1.22) | 64        | 101      | 0.73 (0.51-1.06)        | 62            | 123       | 1.35 (0.91-2.02)        | 31        | 40       | 1.18 (0.60-2.33)        |
| <b>Former</b>                        |         |          |                  |           |          |                         |               |           |                         |           |          |                         |
| Q1 <sup>2</sup>                      | 21      | 29       | 1.00 (ref)       | 9         | 14       | 1.00 (ref)              | 7             | 11        | 1.00 (ref)              | 5         | 4        | 1.00 (ref)              |
| Q2                                   | 26      | 33       | 1.11 (0.51-2.41) | 12        | 14       | 1.40 (0.43-4.53)        | 9             | 15        | 1.04 (0.28-3.87)        | 5         | 4        | 1.92 (0.22-16.9)        |
| Q3                                   | 34      | 59       | 0.76 (0.37-1.58) | 15        | 23       | 0.98 (0.32-3.03)        | 11            | 25        | 0.66 (0.18-2.41)        | 8         | 11       | 0.97 (0.16-5.76)        |
| Q4                                   | 43      | 69       | 0.81 (0.38-1.71) | 15        | 30       | 0.74 (0.23-2.41)        | 20            | 29        | 0.88 (0.24-3.20)        | 8         | 10       | 1.56 (0.24-10.1)        |
| Q5                                   | 39      | 62       | 0.66 (0.29-1.50) | 16        | 35       | 0.52 (0.15-1.78)        | 19            | 21        | 1.07 (0.26-4.47)        | 4         | 6        | 1.39 (0.16-11.9)        |
| <i>p-trend</i> <sup>3</sup>          | -       | -        | 0.85             | -         | -        | 0.17                    | -             | -         | 0.20                    | -         | -        | 0.79                    |
| Per SD <sup>4</sup>                  | 163     | 252      | 0.98 (0.76-1.25) | 67        | 116      | 0.74 (0.48-1.15)        | 66            | 101       | 1.27 (0.87-1.87)        | 30        | 35       | 0.89 (0.37-2.11)        |
| <b>Current</b>                       |         |          |                  |           |          |                         |               |           |                         |           |          |                         |
| Q1 <sup>2</sup>                      | 107     | 98       | 1.00 (ref)       | 28        | 16       | 1.00 (ref)              | 31            | 20        | 1.00 (ref)              | 48        | 62       | 1.00 (ref)              |
| Q2                                   | 84      | 98       | 0.79 (0.52-1.21) | 18        | 22       | 0.61 (0.24-1.56)        | 21            | 19        | 0.63 (0.27-1.51)        | 45        | 57       | 1.07 (0.60-1.90)        |
| Q3                                   | 67      | 72       | 0.89 (0.56-1.42) | 13        | 16       | 0.63 (0.22-1.79)        | 17            | 15        | 0.52 (0.19-1.41)        | 37        | 41       | 1.25 (0.66-2.36)        |
| Q4                                   | 86      | 64       | 1.27 (0.78-2.06) | 17        | 13       | 1.13 (0.38-3.37)        | 21            | 22        | 0.39 (0.15-1.05)        | 48        | 29       | <b>2.37 (1.21-4.65)</b> |
| Q5                                   | 65      | 56       | 1.12 (0.64-1.97) | 13        | 11       | 1.16 (0.34-4.03)        | 9             | 18        | <b>0.16 (0.04-0.59)</b> | 43        | 27       | <b>2.38 (1.11-5.13)</b> |
| <i>p-trend</i> <sup>3</sup>          | -       | -        | 0.5013           | -         | -        | 0.43                    | -             | -         | <b>0.008</b>            | -         | -        | 0.06                    |
| Per SD <sup>4</sup>                  | 409     | 388      | 1.07 (0.88-1.28) | 89        | 78       | 1.25 (0.72-2.14)        | 99            | 94        | <b>0.53 (0.32-0.87)</b> | 221       | 216      | 1.25 (0.98-1.60)        |
| <i>p-heterogeneity</i> <sup>7</sup>  | -       | -        | 0.88             | -         | -        | -                       | -             | -         | -                       | -         | -        | -                       |

1 – Conditional logistic regression. Odds ratios conditioned on age, race, cohort, and date of blood draw, and adjusted for age, smoking (never, current, former <15 years since quit, former 15+ years since quit), body mass index (8 categories), and diabetes.

2 – Sex-specific quintiles were <2.89, 2.89-<4.80, 4.80-<7.22, 7.22-<11.67, and ≥11.67 ng/ml for men and <10.82, 10.82-<17.43, 17.43-<26.55, 26.55-<40.78, and ≥40.78 ng/ml for women

3 – *p-trend* based on a -2 log-likelihood test comparing a model with a continuous leptin measure (standard deviation) to a model without a continuous measure

4 – SDs were 7.34 ng/ml for men and 23.12 ng/ml for women

5 – *p-heterogeneity* calculated comparing a -2 log-likelihood test with 1 degree of freedom comparing a model with an interaction term with sex and one without. A continuous leptin measure was used

6 – Unconditional logistic regression. Models exclude unknown smoking status and odds ratios were adjusted for age, sex, body mass index (3 categories), diabetes, and cohort (note: the current smoking <5 years model does not adjust for cohort)

7 – *p-heterogeneity* calculated comparing a -2 log-likelihood test with 2 degrees of freedom comparing a model with an interaction term with former and current smoking and one without any interaction terms. A continuous leptin measure was used.
